# Supplementary material for: Developmental regulation of regenerative potential in Drosophila by ecdysone through a bistable loop of ZBTB transcription factors
Source: PubMed Central journal article supplement (PMC6386533; doi:10.1371/journal.pbio.3000149), 2019-02-11

*nab>GFP, mcherry<sup>chinmoUTRs</sup>*

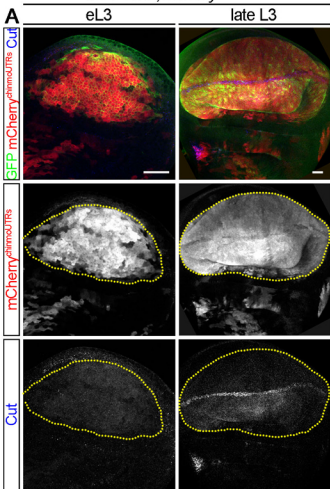

**F**  $\log_{10}$  Relative intensity of **Chinmo** and **Br** in midL3 *FO>EcR<sup>RNAi</sup>* clones

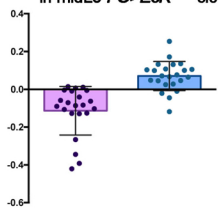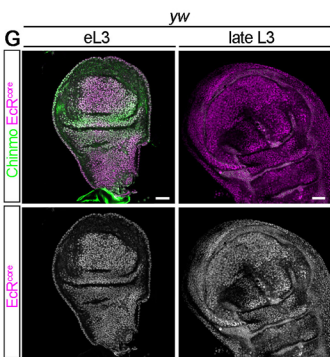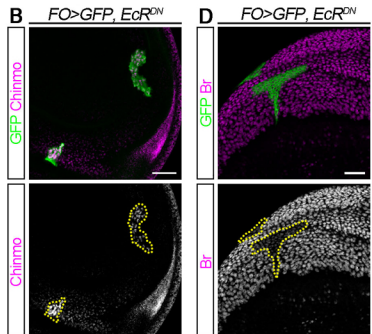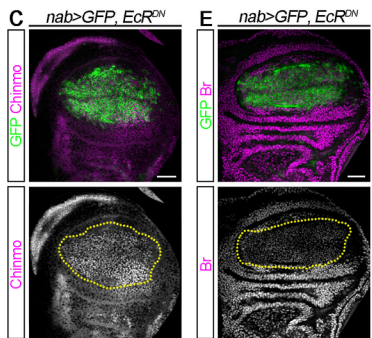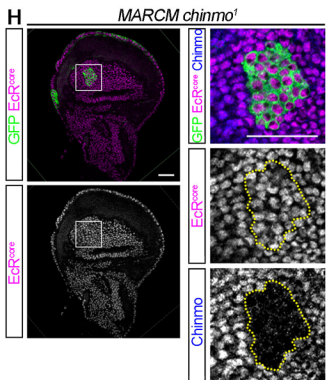

Supplement: pbio.3000149.s003.pdf [file pbio.3000149.s003.pdf]
