# Supplementary material for: Developmental regulation of regenerative potential in Drosophila by ecdysone through a bistable loop of ZBTB transcription factors
Source: PubMed Central journal article supplement (PMC6386533; doi:10.1371/journal.pbio.3000149), 2019-02-11

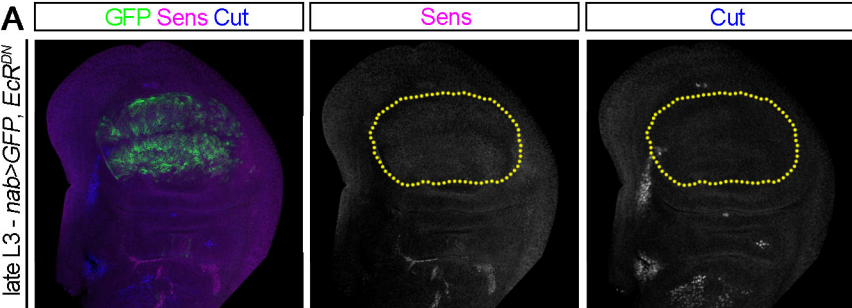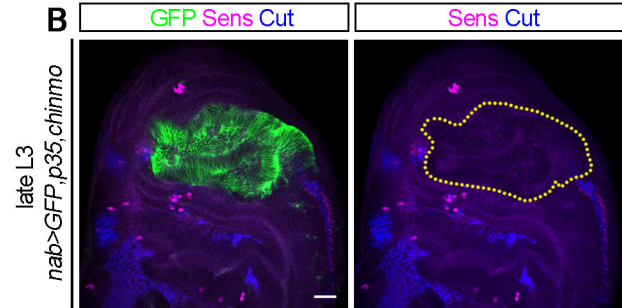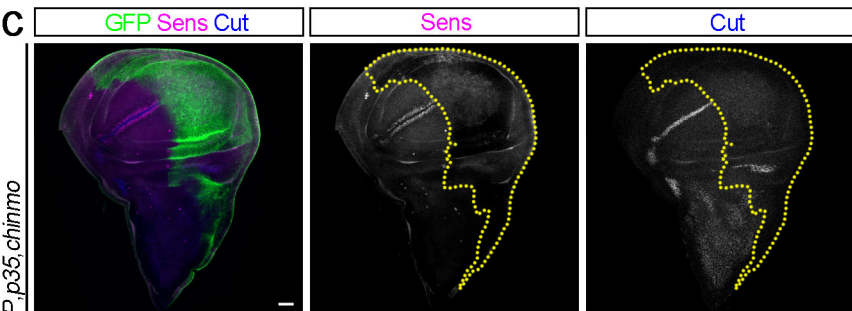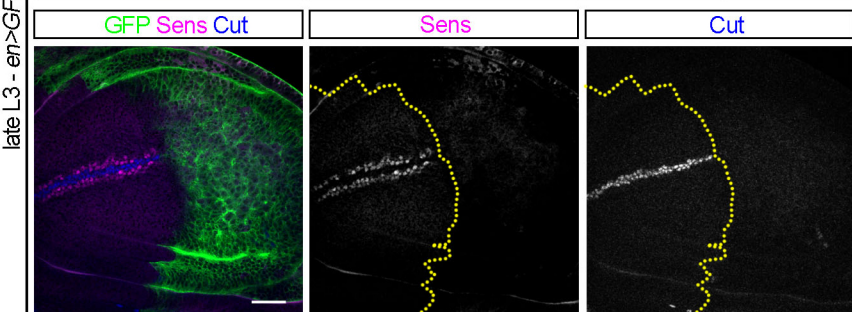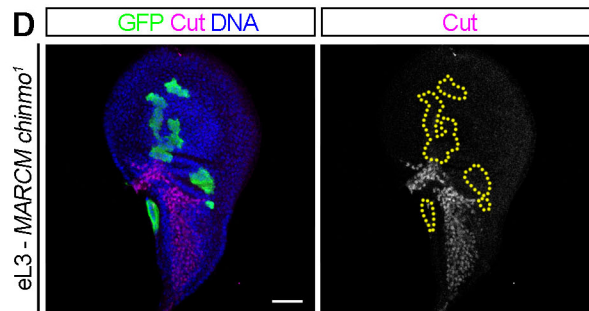

Supplement: pbio.3000149.s005.pdf [file pbio.3000149.s005.pdf]
