# Supplementary material for: Developmental regulation of regenerative potential in Drosophila by ecdysone through a bistable loop of ZBTB transcription factors
Source: PubMed Central journal article supplement (PMC6386533; doi:10.1371/journal.pbio.3000149), 2019-02-11

$rn^{ts}>egr$  $rn^{ts}>egr, chinmo$  $rn^{ts}>egr, EcR^{DN}$  $rn^{ts}>egr, br^{RNAI}$ 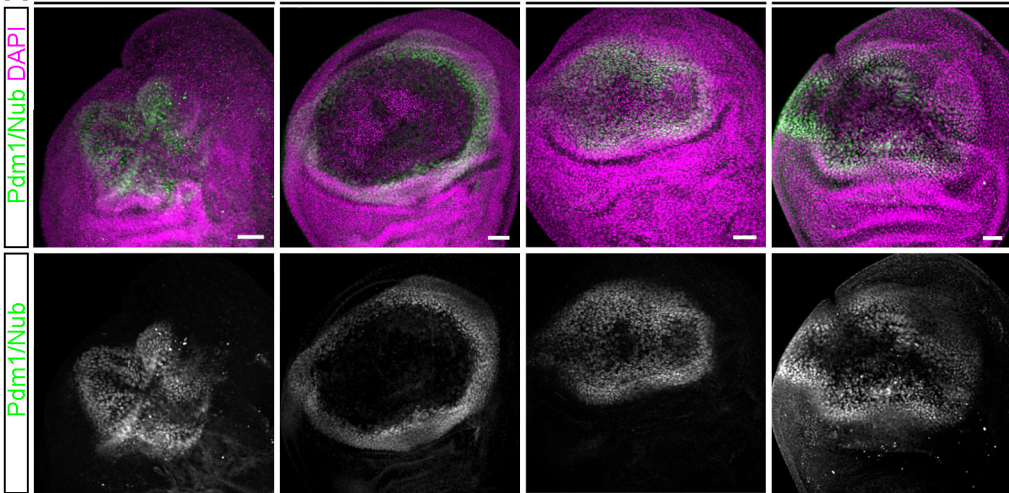

## B Wg intensity

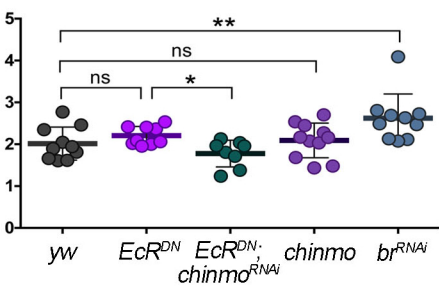

## C Chinmo intensity

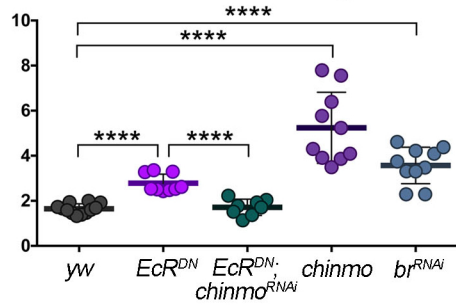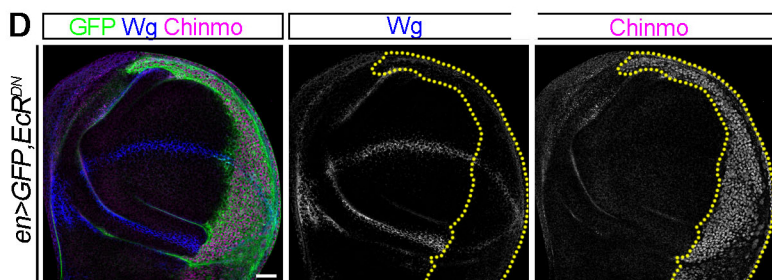

## E $vol^{Dcp-1}/vol^{disc}$

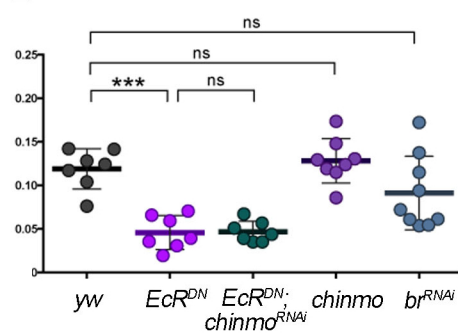

Supplement: pbio.3000149.s007.pdf [file pbio.3000149.s007.pdf]
