# Supplementary material for: Developmental regulation of regenerative potential in Drosophila by ecdysone through a bistable loop of ZBTB transcription factors
Source: PLoS Biol. 2019 Feb 11;17(2):e3000149. doi: 10.1371/journal.pbio.3000149 (PMC6386533; doi:10.1371/journal.pbio.3000149)
Supplement: S1 Data — (XLSX) [file pbio.3000149.s008.xlsx]

## Sheet: Regeneration in the adult wing
Ablation using the rnts> egr system
	Day 7		Day 9
	rnts>egr, yw	rnts>egr, chinmoRNAi	rnts>egr, yw	rnts>egr, yw - 5% sucrose	rnts>egr, yw	rnts>egr, brRNAi
0	5	16	122	74	216	44
0.25	93	91	0	57	0	62
0.5	95	66	0	25	0	31
0.75	142	103	0	6	0	32
1	282	68	0	0	0	3
n=	617	344	122	162	216	172
	Fig 1B		Fig 7E		Fig 8G
Ablation using the rnts> rpr system
	Day 7		Day 9
	rnts> rpr, yw	rnts>rpr, chinmoRNAi	rnts>rpr, yw	rnts>rpr, brRNAi
0	1	2	170	32
0.25	14	20	9	22
0.5	63	38	2	6
0.75	237	70	2	6
1	902	56	2	0
n=	1217	186	185	66
	S1F Fig

## Sheet: relative cell size
Relative cell size of Flp-out wild-type or chinmo compared to surrounding wild-type cells
	Flp-out wt/mean surrounding wt	Flp-out chinmo/mean surrounding wt
	1.64513	0.824878
	0.508129	0.779887
	0.602626	1.34986
	0.554695	0.719983
	1.83291	0.674866
	0.789041	2.84973
	1.4443	2.18213
	0.199611	2.87968
	1.05327	1.51478
	0.918273	1.87484
	1.78255	2.06971
	1.498	1.99477
	0.371769	1.1249
	0.325203	1.97973
	2.81913	1.28983
	0.40165	1.22992
	0.772356	1.25988
	1.62237	0.644914
	0.949367	1.31991
	1.4622	1.34986
	0.335972	0.809965
	0.369493	2.42977
	0.165028	2.12974
	2.86585	2.63969
	0.35387	1.19985
	1.08087	2.99961
	0.433958	2.00981
	1.21587	1.78486
	2.22015	1.55977
	0.0658293	0.782644
	0.246329	0.547807
	1.88781	0.834806
	2.37562	3.75652
	0.400588	0.495645
	1.54593	1.33045
	0.499787	2.13914
	0.428042	2.79134
	1.0557	0.652203
	0.459136	2.16526
	0.99472	0.991291
	1.32235	0.965246
	1.48844	1.17389
	0.387392	2.34786
	0.602626	1.61738
	0.670731	3.86091
	0.459136	1.38261
	0.995933	1.30433
	3.71708	1.09569
	1.03173	1.85221
	0.652832	2.11302
	0.365853	2.79134
	1.2506	2.3739
	2.10305	3.52175
	1.48965	1.04345
	0.376622	0.678248
	0.547566	2.13914
	0.804664	1.09569
	0.919335	0.808688
	0.321562	3.49563
	0.854871	0.678248
	1.66788	2.06086
	0.400588	1.06957
	0.598986	2.63478
	0.480675	1.17389
	1.04857	1.3565
	0.850017	1.01741
	1.91891	1.17389
	0.734133	0.86085
	1.03173	1.33045
	0.315647	3.70435
	0.309731	1.33045
	1.28413	3.33915
	1.93802	1.95654
	1.1059	3.46959
	0.345528	0.86085
	0.889454	1.14785
	0.363426	2.2957
	1.08558	0.939129
	1.43702	1.04345
	0.796322	0.939129
	2.71523	1.12173
	1.18842	2.79134
	0.505702	1.43477
	0.461563	0.730409
	0.669517	5.34785
	0.799811	1.14785
	1.47767	0.286926
	2.42461	1.25217
	0.457923	0.886967
	2.36606	1.09569
	2.8252	1.14785
	0.349168	0.939129
	1.3175	3.78263
	1.26259	0.730409
	1.86749	3.28699
	0.527241	0.391322
	3.35487	1.69566
	1.91057	0.808688
	0.808153	0.234764
	0.540437	0.260881
	0.760374	0.599969
	0.303664	0.573924
	0.398161	0.234764
	2.02175	0.313043
	0.654046	0.234764
	1.363	1.14785
	0.535583	0.365205
	0.789041	0.313043
	1.01504	3.05215
	0.40893	3.46959
	1.14185	1.59133
	0.761587	1.56521
	0.501	3.05215
	1.15019	0.234764
	0.822563	0.913012
	1.54471	0.652203
	1.36179	1.25217
	0.395734	1.38261
	1.19206	1.33045
	1.13942	0.626086
	1.10347	0.991291
	3.13842	1.72177
	0.558335	2.58262
	0.659961	1.95654
	1.08436	0.573924
	0.853657	1.40873
	0.756733	4.3044
	1.22072	1.14785
	1.95713	3.46959
	0.36828	1.25217
	2.27885	5.26957
	0.631294	0.469601
	0.93966	2.1913
	0.433958	1.72177
	1.06646	0.86085
	0.492506	0.417366
	2.16402	1.16579
	0.823776	0.85115
	0.637209	1.07318
	1.99778	1.38781
	1.65711	0.962163
	1.50998	3.21968
	0.834545	2.23896
	0.558335	0.906656
	1.12865	2.25752
	1.03901	3.07156
	0.457923	1.18419
	1.13229	0.388545
	0.724577	1.49883
	0.754458	2.49794
	2.04086	0.832596
	1.38803	4.16329
	1.42276	0.388545
	1.36892	1.07318
	0.36828	4.57039
	1.47767	4.69996
	0.912206	2.36853
	0.818922	0.499558
	0.764014	0.85115
	0.188842	2.12795
	0.528454	3.23823
	1.26259	2.12795
	2.11852	2.34998
	0.326416	1.11028
	0.63008	0.351592
	1.5124	1.57289
	1.54835	3.75619
	0.76993	1.07318
	1.79226	0.351592
	2.31707	3.7933
	1.22315	1.01767
	1.44187	2.84954
	1.39409	0.832596
	1.52075	1.53578
	0.447154	0.647678
	1.05691	1.2952
	0.577447	1.73941
	0.435171	1.83187
	0.738835	0.77709
	0.527241	2.86809
	0.737622	1.38781
	1.12031	0.444051
	1.07845	0.943764
	2.27991	0.740137
	0.613395	0.721583
	1.07359	0.795643
	0.530881	0.85115
	0.447154	0.92521
	1.13336	1.35071
	1.79938	0.444051
	1.15262	2.84954
	0.579874	0.740137
	0.81422	1.73941
	0.223577	1.2952
	0.546353	0.85115
	1.07481	5.64372
	0.472181	1.62839
	0.619311	1.94288
	0.650405	2.12795
	2.23577	1.57289
	0.310793	0.943764
	1.43702	0.314639
	0.689842	1.31375
	2.10896	2.72012
	2.66017	4.23735
	0.786766	0.869704
	0.553482	0.518111
	0.847742	1.07318
	0.346741	0.518111
	0.662388	1.79491
	0.816647	0.77709
	0.652832	0.444051
	0.512831	0.518111
	0.627653	5.45865
	0.720937	0.351592
	0.425615	0.240579
	1.32705	1.2768
	0.693483	0.185073
	0.893094	0.832596
	1.76116	4.34836
	0.269081	0.647678
	0.468692	1.11028
	0.955283	0.481159
	0.328843	5.27357
	0.263014	0.425652
	0.66709	2.47954
	0.31686	1.05478
	0.212808	3.92287
	0.289406	3.51577
	0.231919	0.888257
	0.371769	4.57039
	0.509343	0.962163
	1.68214	1.97983
	0.1805	0.518111
	0.386178	0.647678
	0.423188	1.79491
	1.54229	1.90593
	1.59128	0.258978
	0.53801	0.518111
	1.78497	0.481159
	0.968479	0.77709
	0.576234	0.407099
	1.84595	1.88737
	0.792682	0.629124
	1.45628	0.481159
	1.0129
	0.454715
	3.38272
	0.876125
	1.48201
	0.849844
	1.36144
	0.550412
	1.28379
	2.40388
	1.15208
	0.378477
	1.1257
	0.277263
	1.59015
	3.33558
	0.783237
	0.920564
	1.17285
	0.323005
	1.16171
	0.281476
	0.285588
	0.329926
	0.600267
	0.393725
	0.24125
	1.10765
	1.48201
	0.547604
	0.758359
	0.927485
	0.686235
	1.19361
	0.872013
	0.95798
	1.17144
	0.779124
	0.479692
	1.2851
	1.20334
	1.2865
	0.554525
	0.730573
	0.955171
	0.586424
	1.94084
	0.6751
	1.46255
	0.935811
	0.561447
	1.57209
	0.535165
	0.354904
	0.262015
	0.639088
	0.262015
	0.357713
	0.217677
	1.42935
	0.299431
	1.45152
	1.54019
	0.234329
	0.217677
	1.14516
	0.24125
	1.33917
	0.804101
	0.381286
	0.546199
	0.754146
	1.98939
	1.74954
	0.522626
	0.364634
	1.44871
	0.85817
	0.587829
	0.435354
	2.37479
	1.37247
	0.930194
	0.390916
	0.632167
	0.601672
	1.10353
	0.379882
	1.16312
	0.21216
	0.90662
	1.05498
	1.29342
	1.45844
	0.256498
	1.45152
	0.280071
	1.30867
	0.436658
	0.220386
	0.325814
	0.525435
	0.719538
	1.05779
	1.75646
	0.525435
	1.53056
	0.910833
	0.399242
	0.747224
	0.862282
	1.19502
	0.811023
	0.661257
	0.838709
	0.706999
	1.03141
	0.847035
	0.798484
	0.327218
	1.4141
	0.569772
	0.786045
	0.356308
	1.3822
	0.824866
	2.27357
	0.607189
	2.90303
	0.72646
	0.39232
	3.75558
	1.7038
	0.888664
	1.07023
	0.309162
	1.18529
	0.58502
	0.618323
	0.335544
	2.19041
	1.8009
	2.06151
	0.465849
	1.07304
	0.335544
	2.33045
	1.06331
	2.56749
	0.278667
	0.335544
	0.438063
	0.849844
	1.49174
	0.213464
	1.53056
	1.19221
	2.85308
	0.414489
	0.885856
	0.899699
	0.510187
	0.722247
	0.457523
	0.359017
	0.249576
	0.609998
	0.501861
	0.751438
	0.96771
	0.947774
	0.587627
	0.796204
	2.08948
	1.34066
	0.583472
	0.609244
	2.10863
	1.3082
	0.349901
	3.21818
	0.698959
	1.38552
	1.88836
	1.28412
	0.150412
	0.703957
	0.95499
	1.05224
	0.7605
	0.775431
	0.845281
	0.849436
	2.09363
	0.713111
	2.68626
	0.401445
	0.99407
	0.434683
	1.4096
	0.694804
	0.907601
	0.582628
	0.468764
	0.283427
	0.756345
	0.589249
	1.33313
	0.556856
	1.1104
	0.241036
	1.64902
	0.919221
	0.297578
	0.805357
	0.996537
	0.490381
mean=	0.987124	1.59745
n=	462	245
	3 discs, 6 clones	3 discs, 9 clones
	Fig 5C

## Sheet: Chinmo and Br relative intensit
Relative intensity of Chinmo and Br in midL3 Flp-out EcRRNAi clones
	Chinmo intensity					Br intensity
	inside clone	outside clone	inside/outside (=A)	log10 (A)		inside clone	outside clone	inside/outside (=A)	log10 (A)
clone 1	1405	1424	0.986657	-0.00583367		1829	1554	1.17696	0.0707627
	1307	1496	0.873663	-0.058656		1629	1294	1.25889	0.0999868
	1607	1766	0.909966	-0.0409748		2326	2006	1.15952	0.0642788
clone 2	1705	1741	0.979322	-0.00907439		2134	2018	1.05748	0.0242733
clone 1	663	887	0.747463	-0.12641		775	699	1.10873	0.0448245
	608	703	0.864865	-0.0630517		705	475	1.48421	0.171496
clone 2	1040	1025	1.01463	0.00630947		1503	1261	1.19191	0.0762439
clone 3	827	1049	0.78837	-0.10327		1063	1116	0.952509	-0.0211309
clone4	803	1082	0.742144	-0.129512		737	582	1.26632	0.102545
	763	940	0.811702	-0.0906033		677	529	1.27977	0.107133
	725	973	0.745118	-0.127775		672	535	1.25607	0.0990155
clone 1	724	1337	0.541511	-0.266393		1213	953	1.27282	0.104768
	664	1468	0.452316	-0.344558		895	993	0.901309	-0.0451262
	1028	996	1.03213	0.0137338		822	608	1.35197	0.130968
clone 2	220	543	0.405157	-0.392377		345	453	0.761589	-0.118279
	217	572	0.379371	-0.420936		384	360	1.06667	0.0280287
clone 1						1015	743	1.36608	0.135477
	932	909	1.0253	0.010852		1336	986	1.35497	0.13193
clone 2	856	1008	0.849206	-0.0709868		1144	1172	0.976109	-0.0105016
	927	1124	0.824733	-0.0836866		1431	1228	1.16531	0.0664413
	1142	1394	0.819225	-0.0865967		2052	1838	1.11643	0.0478318
clone 3	629	635	0.990551	-0.00412308		1049	585	1.79316	0.25362
	620	793	0.781841	-0.106881		1008	907	1.11136	0.0458532
mean=			0.79842					1.19262
n=			22					23
	22 focal planes, 11 clones, 4 discs					23 focal planes, 11 clones, 4 discs
	S3F Fig

## Sheet: Relative Wg+ volume
Volume of anti-Wg staining over total wing disc volume at R0
	Day 7
	rnts>egr, yw	rnts>egr, chinmoRNAi	rnts>egr, br-Z1
	0.0980149	0.0826509	0.0509727
	0.212958	0.0181725	0.140237
	0.157519	0.0222102	0.118124
	0.1147	0.0489262	0.11093
	0.12331	0.068555	0.0906689
	0.181959	0.0405312	0.0934267
	0.130564	0.0217012	0.0983514
	0.114588	0.0282616	0.0788815
	0.121861	0.0340212	0.0341011
	0.156434	0.0300071	0.0960935
	0.189175		0.124403
			0.101513
			0.0810344
mean=	0.145553	0.0395037	0.093749
n=	11	10	13
	Fig 1F
	Fig 7D		Fig 7D
	Day 9
	rnts>egr, yw	rnts>egr, chinmo	rnts>egr, brRNAi	rnts>egr, EcRDN	rnts>egr, EcRDN; chinmoRNAi
	0.033805	0.263642	0.0824062	0.105689	0.0542351
	0.0253254	0.190062	0.0764537	0.114539	0.0460829
	0.0508191	0.174023	0.10923	0.071319	0.0621017
	0.0453131	0.123112	0.0853354	0.105692	0.0453903
	0.0713075	0.111901	0.0940598	0.0837343	0.0509909
	0.030547	0.218906	0.112201	0.073384	0.0428094
	0.0413437	0.149119	0.151857	0.10195	0.0324287
	0.0433391	0.11456	0.158576	0.0812159	0.0456559
	0.0472777	0.156121	0.188893	0.0867763
	0.0320055	0.154409	0.122986
	0.0729154		0.121772
	0.0391729
	0.0254129
mean=	0.042968	0.165586	0.118525	0.0915888	0.0474619
n=	13	10	11	9	8
	Fig 1F
		Fig 8D

## Sheet: Relative Dcp-1+ volume
Volume of anti-Dcp-1 staining over total wing disc volume at R0
	Day 9
	rnts>egr, yw	rnts>egr, chinmo	rnts>egr, brRNAi	rnts>egr, EcRDN	rnts>egr, EcRDN; chinmoRNAi
	0.0761379	0.148098	0.053737	0.0356362	0.0351246
	0.12821	0.130478	0.172312	0.0704589	0.0567283
	0.117186	0.0858327	0.0609534	0.0393383	0.067233
	0.124345	0.119238	0.0721344	0.0659218	0.0351677
	0.104016	0.17358	0.115035	0.0307742	0.0510005
	0.142159	0.1239	0.0613145	0.0592985	0.0391712
	0.141546	0.129341	0.137512	0.01946	0.0438946
		0.115039	0.094031
			0.0545431
mean=	0.119086	0.128188	0.0912857	0.0458411	0.0469029
n=	7	8	9	7	7
	S7E Fig

## Sheet: Relative Wg intensity
Relative anti-Wg staining intensity in the wing pouch at R0
	Day 7
	rnts>egr, yw		rnts>egr, chinmoRNAi		rnts>egr, br-Z1
	2.83791	2.74023	1.41678	1.48255	1.86421	2.12161
	2.52399		1.4201		1.43262
	2.85879		1.61076		3.06798
	1.6049	2.6905	1.55247	1.90445	2.66477	2.13675
	2.77839		2.01215		2.20912
	3.6882		2.14873		1.53635
	1.7903	1.99393	1.84495	1.77008	1.82278	1.97262
	1.93962		1.82617		2.44632
	2.25186		1.63911		1.64876
	2.31597	2.72842	1.56734	1.58869	2.07027	2.03345
	2.32445		1.73706		2.04789
	3.54483		1.46165		1.9822
	3.37071	3.20324	2.47454	2.15941	1.63626	1.80857
	3.33239		1.93891		1.75456
	2.90663		2.06478		2.03488
	1.93819	1.94781	1.77385	1.66739	2.27476	2.10742
	2.034		1.59145		2.42694
	1.87124		1.63688		1.62054
	2.13823	1.92178	1.67816	1.72221	1.32918	1.76835
	1.72987		1.76551		1.80475
	1.89724		1.72297		2.17112
	3.07036	2.86792	1.98514	1.94095	2.01624	2.10576
	2.65961		1.95792		2.24837
	2.87379		1.87981		2.05268
	2.33487	2.8719	2.64706	2.62823	2.18053	1.94752
	4.10197		1.73077		2.08525
	2.17887		3.50685		1.57679
	2.71296	2.59253	1.78867	1.92663	4.07395	2.9688
	2.80769		1.72324		2.64171
	2.25694		2.26797		2.19072
	2.22659	1.93543			1.7389	1.86517
	1.91392				1.69733
	1.66576				2.15929
	2.90679	2.69962
	2.11497
	3.0771
	3.6961	3.18361
	2.58589
	3.26883
mean=		2.56745		1.87906		2.076
n=		13		10		11
	S1B Fig
	S6A Fig				S6A Fig
	Day 9
	rnts>egr, yw		rnts>egr, chinmo		rnts>egr, brRNAi		rnts>egr, EcRDN		rnts>egr, EcRDN; chinmoRNAi
	1.90966	1.80854	3.55085	2.53618	3.00641	2.46941	2.15984	1.99969	2.50735	2.03864
	1.66529		2.19231		2.34759		1.87072		1.97006
	1.85066		1.86538		2.05422		1.9685		1.6385
	1.91901	2.04646	2.33721	2.70293	2.2808	2.11582	1.98377	2.0202	2.29257	1.95669
	2.07899		3.35593		1.88287		2.06858		1.98419
	2.14136		2.41566		2.18381		2.00823		1.59332
	2.0424	1.94264	1.18732	1.43594	3.80505	2.72622	2.96599	2.36464	1.41519	1.37747
	1.87663		1.63527		2.67663		2.38907		1.43019
	1.90888		1.48523		1.69697		1.73887		1.28702
	1.34404	1.89523	2.80313	2.44766	2.23441	2.07677	2.88991	2.08819	1.83111	1.80767
	2.18156		2.48		2.11507		1.61785		1.79607
	2.16007		2.05986		1.88083		1.75682		1.79583
	2.18129	2.34767	1.25647	1.68154	2.43437	2.48845	2.37812	2.40546	1.33534	1.2378
	2.5671		1.80377		2.61391		1.75645		1.24054
	2.29461		1.98439		2.41709		3.08182		1.13753
	2.67322	2.45974	2.1755	2.07708	2.53506	2.1292	2.32508	2.53321	1.77031	2.12818
	2.22222		2.14987		1.99088		2.9351		1.5403
	2.48379		1.90588		1.86167		2.33945		3.07394
	2.38079	2.77103	2.57712	2.27451	2.59331	2.68954	2.21995	2.41531	1.525	1.7115
	2.64591		2.13556		2.27147		2.38961		2.08451
	3.28638		2.11085		3.20385		2.63636		1.525
	1.37383	1.60554	2.01606	2.03018	3.20574	2.63117	1.70447	1.95423	1.7631	1.96235
	2.33423		1.97847		2.30205		2.17225		2.13184
	1.10856		2.09599		2.38571		1.98598		1.99211
	1.24714	1.61492	1.52531	1.47862	3.32898	4.08742	2.20046	2.06099
	2.19932		1.34646		4.59206		1.96685
	1.39829		1.5641		4.34122		2.01567
	2.21849	1.65832	2.33661	2.16772	3.55556	2.80522
	0.993443		2.51093		2.20563
	1.76303		1.65562		2.65447
			2.1791	2.16056
			2.11348
			2.18911
mean=		2.01501		2.09027		2.62192		2.20466		1.77754
n=		10		11		10		9		8
	S1B Fig
	S7B Fig

## Sheet: Relative Chinmo intensity
Relative anti-Chinmo staining intensity in the wing pouch at R0
	Day 7
	rnts>egr, yw		rnts>egr, chinmoRNAi		rnts>egr, br-Z1
	1.57133	1.52732	1.63575	1.58444	1.61673	1.77906
	1.49202		1.66077		1.86086
	1.51861		1.4568		1.85959
	1.55782	1.63918	1.35553	1.46302	2.16343	1.79115
	1.45518		1.54461		2.37647
	1.90454		1.48891		0.833536
	1.93892	1.74156	1.55955	1.50796	2.5343	2.14031
	1.73879		1.46254		2.27683
	1.54697		1.50181		1.60981
	2.15993	1.95591	1.96128	1.7571	1.91549	1.83135
	1.97821		1.57095		1.60614
	1.72958		1.73908		1.9724
	2.74008	2.44986	1.40864	1.37196	1.81176	1.66058
	2.02486		1.53739		1.70963
	2.58464		1.16986		1.46034
	1.72254	2.14629	1.49738	1.34033	2.04579	1.96998
	2.44168		1.30124		1.9974
	2.27465		1.22237		1.86675
	2.31133	2.39194	1.79339	1.76266	1.61218	1.49138
	2.54441		1.93343		1.44757
	2.32008		1.56115		1.41439
	2.41016	1.98317	1.87438	1.85812	1.66507	1.70698
	2.06389		1.74109		1.54076
	1.47547		1.95888		1.91509
	2.55319	2.60746	2.06791	1.87664	1.48014	1.50535
	3.08233		1.97911		1.40267
	2.18685		1.58291		1.63323
	1.98641	1.80137	1.49466	1.56402	2.14894	2.25786
	1.59318		1.61127		2.18675
	1.82453		1.58612		2.43789
	1.34491	1.6182	1.55037	1.6112	1.54195	1.75903
	2.09209		1.58435		1.70426
	1.41759		1.69887		2.0309
	2.13425	2.05137			2.01355	2.20196
	1.97374				2.33333
	2.04611				2.25899
	2.33851	2.26063
	2.32893
	2.11446
mean=		2.0134		1.60886		1.84125
n=		13		11		12
	S1C Fig
	S6B Fig				S6B Fig
	Day 9
	rnts>egr, yw		rnts>egr, chinmo		rnts>egr, brRNAi		rnts>egr, EcRDN		rnts>egr, EcRDN; chinmoRNAi
	2.34146	1.91978	5.67742	3.90702	4.16337	4.09225	1.91667	2.43237	2.50735	2.03864
	1.78414		3.21756		4.69672		1.97924		1.97006
	1.63372		2.82609		3.41667		3.4012		1.6385
	1.58814	1.66088	3.75367	3.49535	3.0793	3.47231	2.31086	2.47947	1.93447	1.92567
	1.7004		3.03484		3.57276		2.62097		2.09786
	1.69409		3.69753		3.76489		2.50658		1.74468
	1.64156	1.46697	4.13058	3.86441	5.55752	4.61082	2.78067	2.50969	1.06007	1.13585
	1.25743		4.23123		4.48264		2.47013		1.15501
	1.50193		3.23143		3.79231		2.27828		1.19248
	1.76904	1.72668	3.8858	4.30457	3.01476	4.22267	2.36364	2.53208	1.74291	1.36855
	1.5		4.91483		3.68122		2.50784		1.29231
	1.91099		4.11308		5.97203		2.72477		1.07045
	1.96319	1.93928	8.3	7.79276	5.63265	3.74467	2.52717	2.6206	2.06636	2.22538
	2.11896		6.95161		3.325		2.72247		2.48658
	1.73568		8.12667		2.27636		2.61215		2.1232
	1.32979	1.38576	5.149	5.76639	3.10276	4.37575	3.18587	3.29179	2.04971	1.77678
	1.43413		5.675		3.72585		3.45139		1.19868
	1.39335		6.47518		6.29864		3.2381		2.08194
	2.29792	1.99909	10.1266	6.39091	2.12842	3.30977	3.79006	3.27685	1.208	1.51586
	2.09719		4.63481		3.70677		2.69949		1.61508
	1.60217		4.41135		4.09412		3.341		1.72449
	1.60772	1.60144	5.92105	5.23372	2.06517	2.28767	3.88667	3.35774	1.47835	1.70885
	1.5017		4.97209		1.96952		3.45562		1.74785
	1.69489		4.808		2.82831		2.73094		1.90036
	1.86111	1.46215	14.1111	7.55862	2.06517	2.28767	2.54938	2.5357
	1.28723		4.12775		1.96952		2.67081
	1.2381		4.43699		2.82831		2.3869
	1.18537	1.32888	4.60406	4.08826	3.27273	3.30298
	1.71831		4.23952		3.14428
	1.08297		3.4212		3.49194
	1.6943	1.5855
	1.21857
	1.84363
	2.20284	1.69306
	1.28324
	1.5931
mean=		1.64745		5.2402		3.57066		2.78181		1.71195
n=		12		10		10		9		8
	S1C Fig
	S7C Fig

## Sheet: Relative MMP1+ volume
Volume of anti-MMP1 staining over total wing disc volume at R0
	Day 7		Day 9
	rnts>egr, yw		rnts>egr, yw	rnts>egr, chinmo	rnts>egr, brRNAi	rnts>egr, EcRDN
	0.0958315	0	0.0303397	0.135083	0.131991	0.120647
	0.0919892	0	0.0635752	0.180145	0.156516	0.126622
	0.20545	0	0.0391296	0.205765	0.122282	0.162312
	0.12194	0	0.0583972	0.260569	0.145353	0.0743905
	0.152819	0	0.0429704	0.498193	0.131021	0.184768
	0.201878	0	0.046635	0.216527	0.164884	0.164904
	0.166651	0	0.0709798	0.192867	0.159161	0.147899
	0.201751	0	0.0576958	0.183204	0.15947	0.109118
	0.131859	0	0.0651914	0.226792	0.13271
	0.130078	0	0.151633	0.191894	0.129671
		0	0.057847	0.234167	0.172131
		0	0.0800962		0.162274
		0	0.0375345
		0	0.0372185
mean=	0.150025	0	0.059946	0.229564	0.147289	0.136333
n=	10		14	11	12	8
	Fig 8E

## Sheet: Relative dilp8+ volume
Volume of anti-MMP1 staining over total wing disc volume at R0
	Day 7		Day 9
	rnts>egr, yw		rnts>egr, yw	rnts>egr, yw
	0.101362	0	0.0340805	0.222976
	0.147739	0	0.0484087	0.246722
	0.189236	0	0.0467672	0.181692
	0.210287	0	0.0849697	0.194439
	0.140908	0	0.102596	0.32234
	0.18974	0	0.0842783	0.156874
	0.121631	0	0.0710076	0.139793
	0.177831	0	0.0330546	0.140031
	0.172508	0	0.0308876	0.203992
	0.152239	0	0.0336017	0.163829
		0		0.183324
mean=	0.160348	0	0.0569652	0.196001
n=	10		10	11
	Fig 8F
